# Supplementary figures and images for: Global Transcriptomic Analysis Reveals Insights into the Response of ‘Etrog’ Citron (Citrus medica L.) to Citrus Exocortis Viroid Infection
Source: MDPI journal article supplement (doi:10.3390/v11050453), 2019-05-17

Pearson correlation between samples

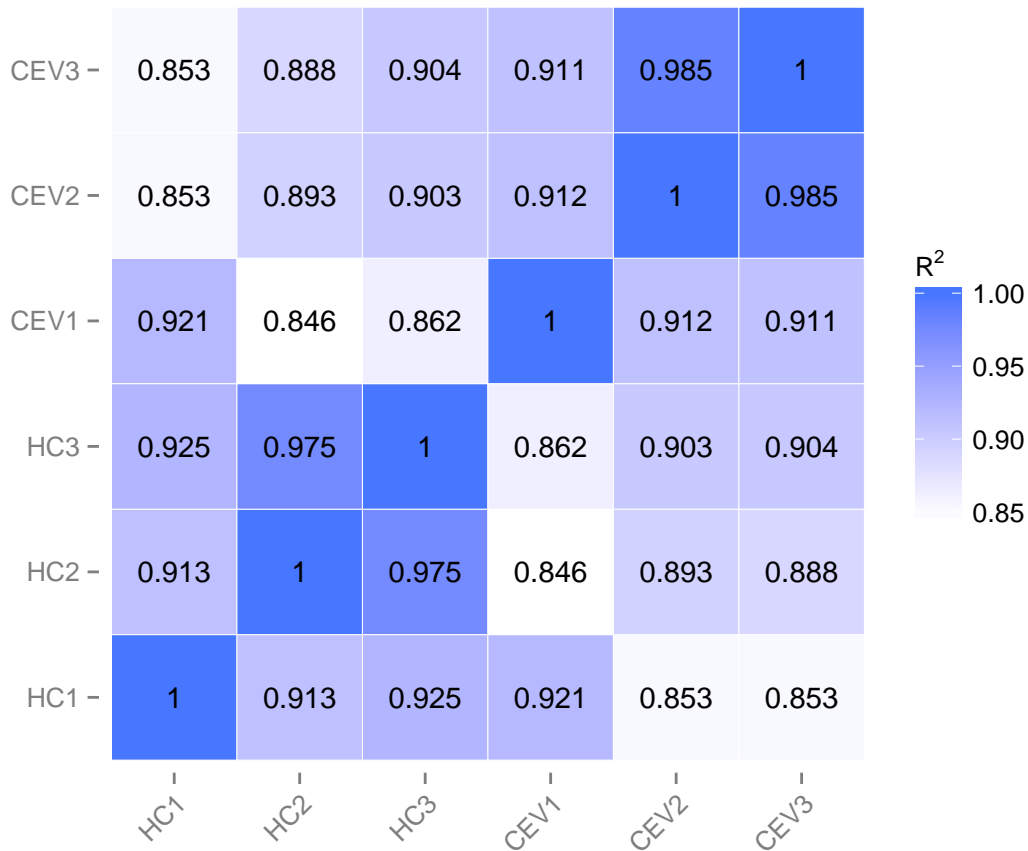

Supplement: s1 [file s1]

Cluster analysis of differentially expressed genes

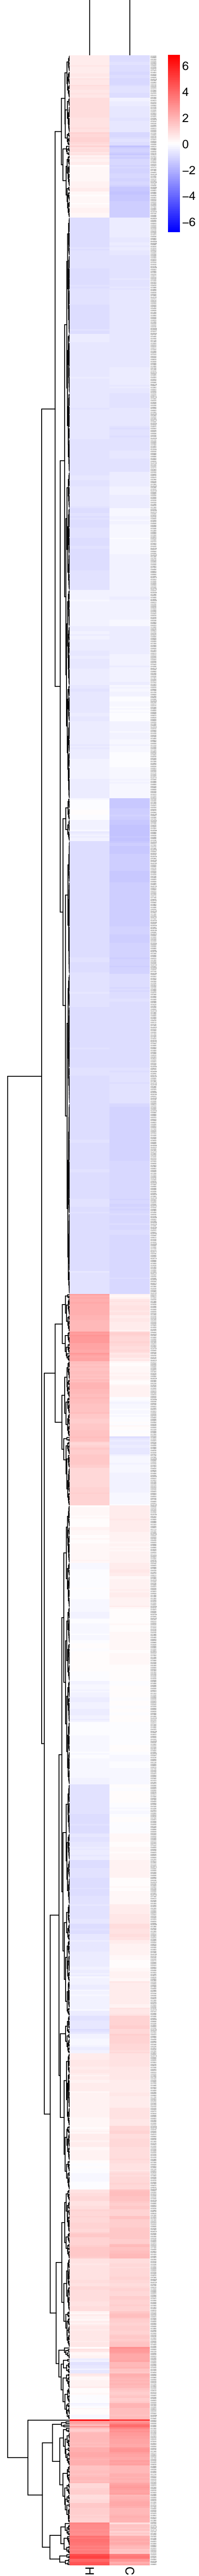

Supplement: s1 [file s1]
